# Supplementary material for: Genome-Wide Analysis of Potassium Channel Genes in Rice: Expression of the OsAKT and OsKAT Genes under Salt Stress
Source: MDPI journal article supplement (doi:10.3390/genes12050784), 2021-05-20
Supplement: s1 [file s1]

# Genome-wide Analysis of *potassium channel* Genes in Rice: Expression of the *OsAKT* and *OsKAT* Genes under Salt Stress

Zahra Musavizadeh <sup>1</sup>, Hamid Najafi-Zarrini <sup>2</sup>, Seyed Kamal Kazemitabar <sup>2</sup>, Seyed Hamidreza Hashemi <sup>3</sup>, Sahar Faraji <sup>2</sup>, Gianni Barcaccia <sup>4</sup>, Parviz Heidari <sup>5,\*</sup>

<sup>1</sup> Department of Biochemical Sciences, Sapienza University of Rome, 00185 Rome, Italy; Zahra.musavizadeh@uniroma1.it (Z.M.)

<sup>2</sup> Department of Plant Breeding, Sari Agricultural Sciences and Natural Resources University (SANRU), Sari 4818166996, Iran; najafi316@yahoo.com (H.N.-Z.); kazemi\_ka@yahoo.com (S.K.K.); sahar.faraji@rocketmail.com (S.F.)

<sup>3</sup> Genetics and Agricultural Biotechnology Institute of Tabarestan, Sari Agricultural Sciences and Natural Resources University, Sari 4818166996, Iran; irahamidreza@yahoo.com (S.H.H.)

<sup>4</sup> Laboratory of Genomics for Breeding, DAFNAE, Campus of Agripolis, University of Padova, Legnaro, 35020 Padova, Italy; gianni.barcaccia@unipd.it (G.B.)

<sup>5</sup> Faculty of Agriculture, Shahrood University of Technology, 3619995161 Shahrood, Iran

\* Correspondence: heidarip@shahroodut.ac.ir; Tel.: +98-912-0734-034

**Table S1.** List of designed primers for Real-time PCR

| Gene          | Accession number    | Primer (5'-3')                                                      | Gene ID in NCBI | Product size (bp) |
|---------------|---------------------|---------------------------------------------------------------------|-----------------|-------------------|
| <i>OsAKT1</i> | <i>Os01g0648000</i> | Forward: TACAGCCGACAATGTGGTGAAT<br>Reverse: GTCAAGAACAAGCCATGTGGTA  | LOC4326245      | 148               |
| <i>OsAKT2</i> | <i>Os05g0428700</i> | Forward: CTACCTCATCGGCAACATGAC<br>Reverse: CGAAATTGGAGGCAGCACGAA    | LOC4338867      | 92                |
| <i>OsKAT3</i> | <i>Os01g0756700</i> | Forward: CCATGTACTGGTCCATCACGA<br>Reverse: TTGGTCATGTTGCCGATGAGG    | LOC4325143      | 142               |
| <i>OsKAT2</i> | <i>Os01g0210700</i> | Forward: GGACCAGGAATTTTAGGGACAC<br>Reverse: CCTTGGGGGAGACTATCCAATGT | LOC4325560      | 159               |
| <i>OsKAT1</i> | <i>Os02g0245800</i> | Forward: CCGAGTCAGTTCACTATTTGCC<br>Reverse: TGCGAAGAGGGTCACAGAAATA  | LOC4328864      | 97                |

**Table S2.** List of conserved motifs predicted in potassium channel proteins of rice

| Motif No. | E-value  | Amino acid sequence of motif                        | Width (aa) |
|-----------|----------|-----------------------------------------------------|------------|
| Motif 1   | 3.6e-273 | YWSITTLTTVGYGDLHAENTGEMLFSAFMLFNLGLTAYJIGNMTNLVVH   | 50         |
| Motif 2   | 1.6e-162 | RLWRLRRVSKLFARLEKDIRFNWTRCIKLSVTLFAVHCAACI          | 45         |
| Motif 3   | 8.8e-139 | ZSVYLFKGVSDFILQLVTEMKAEYFPPKEDIILQNEAPTDVYIVVSGAV   | 50         |
| Motif 4   | 8.2e-123 | GTSRTRKFRDTIQAASEFGARNQLPEAIKEQMLAHICLRFRTTEELLQQEM | 50         |
| Motif 5   | 1.2e-102 | VDAFFAIDIALTFFVAYRDKKTYLLVDDPKKIATRYLSSWF           | 41         |
| Motif 6   | 4.7e-091 | FGEIGVLCNIPQPFVTRTRELQCLLRJSKTALLEIIQENREDGRIILSNL  | 50         |
| Motif 7   | 5.8e-071 | PSLGATANQSPKLRKFIISPYDPRYRIWETFLIVLVVYSAWICPFELAF   | 49         |

|          |          |                                                          |    |
|----------|----------|----------------------------------------------------------|----|
| Motif 8  | 8.6e-065 | DRYPIELTWIGAQIPNFEDRSLWFRYVT                             | 29 |
| Motif 9  | 1.7e-032 | AADLDNDGRVKGADFVVYKLKELGKISZEDISMFLDZFDKLDADHSGKJS       | 50 |
| Motif 10 | 2.2e-031 | WKVEGLGWVDAFYLVVASVTTLGYGDRSFSSPAGRLFAVAWJLVSTJAVA       | 50 |
| Motif 11 | 2.9e-029 | GADPNESDYDGR TALHIAASKGYEDCVRFL LQQGADVNAKDKFGNTPL<br>WE | 50 |
| Motif 12 | 4.3e-029 | LDEL PKAIRSSIAQYLFLPVV                                   | 21 |
| Motif 13 | 2.6e-025 | LDVASTIPLQIIYQLVTGKRQGL                                  | 23 |
| Motif 14 | 2.1e-016 | GFRPTKILTVEGA EIDDIEVIRDGDHLF                            | 28 |
| Motif 15 | 6.4e-014 | YGGDPNARDRDGR TPLHIAAAEGLYL VAKLLVENGADIDAKDRWGNTP       | 48 |

**Table S3.** The predicted duplicated gene pairs in the potassium channel protein family in rice

| Gene 1              | Gene 2              | Ka   | Ks   | Ka/Ks       | p-value  | Divergence time<br>(MYA) |
|---------------------|---------------------|------|------|-------------|----------|--------------------------|
| <i>Os01g0756700</i> | <i>Os01g0210700</i> | 0.26 | 1.1  | 0.236363636 | 1.04E-06 | 84.61538462              |
| <i>Os01g0210700</i> | <i>Os02g0245800</i> | 0.29 | 1.53 | 0.189542484 | 2.52E-08 | 117.6923077              |
| <i>Os03g0752300</i> | <i>Os07g0108800</i> | 0.28 | 2.66 | 0.105263158 | 1.30E-06 | 204.6153846              |
| <i>Os06g0254200</i> | <i>Os04g0117500</i> | 0.31 | 1.42 | 0.218309859 | 3.28E-05 | 109.2307692              |
| <i>Os06g0254200</i> | <i>Os01g0718700</i> | 0.35 | 1.83 | 0.191256831 | 1.46E-08 | 140.7692308              |

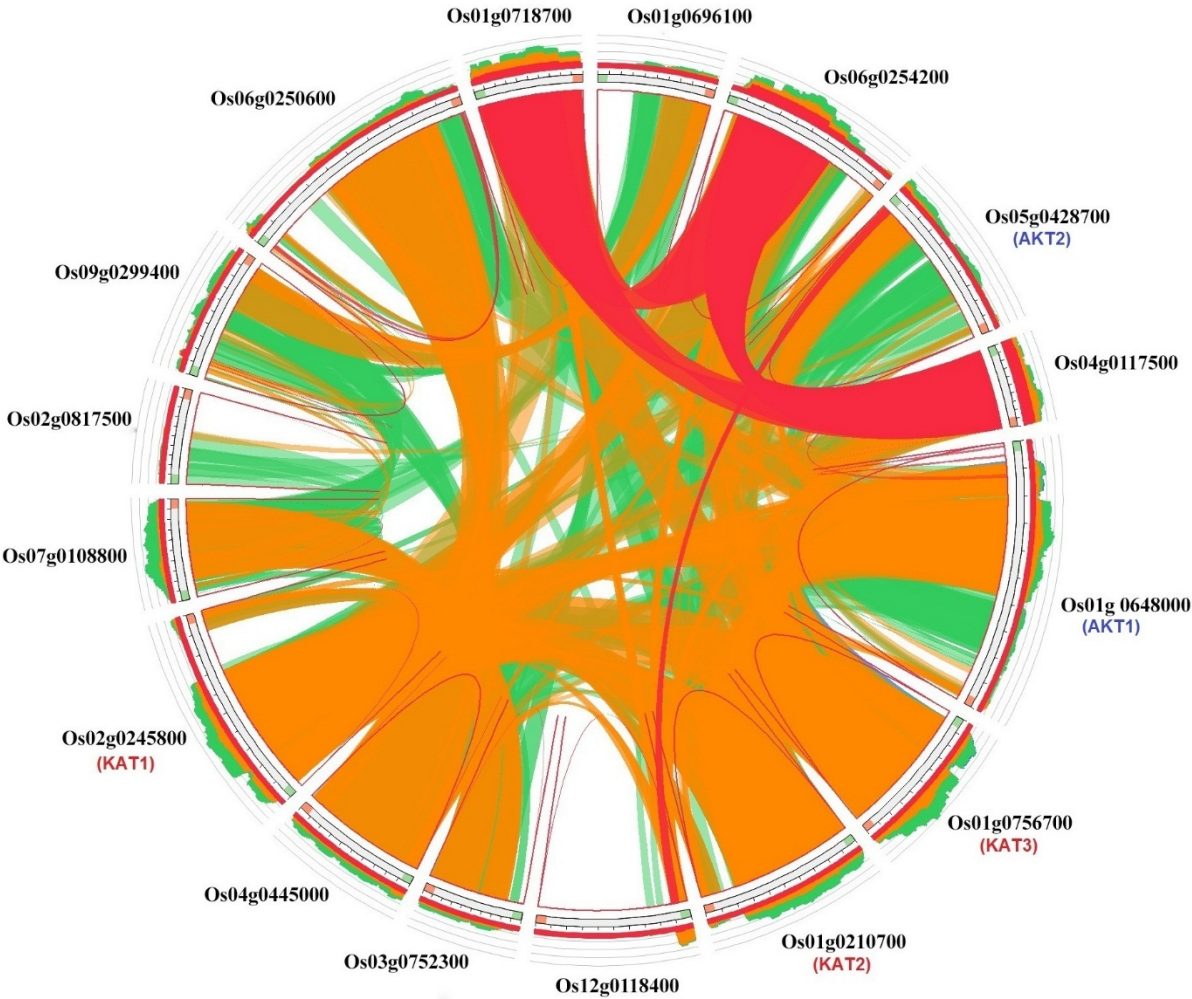

**Figure S1.** Synteny analysis of  $K^+$  channel genes in rice

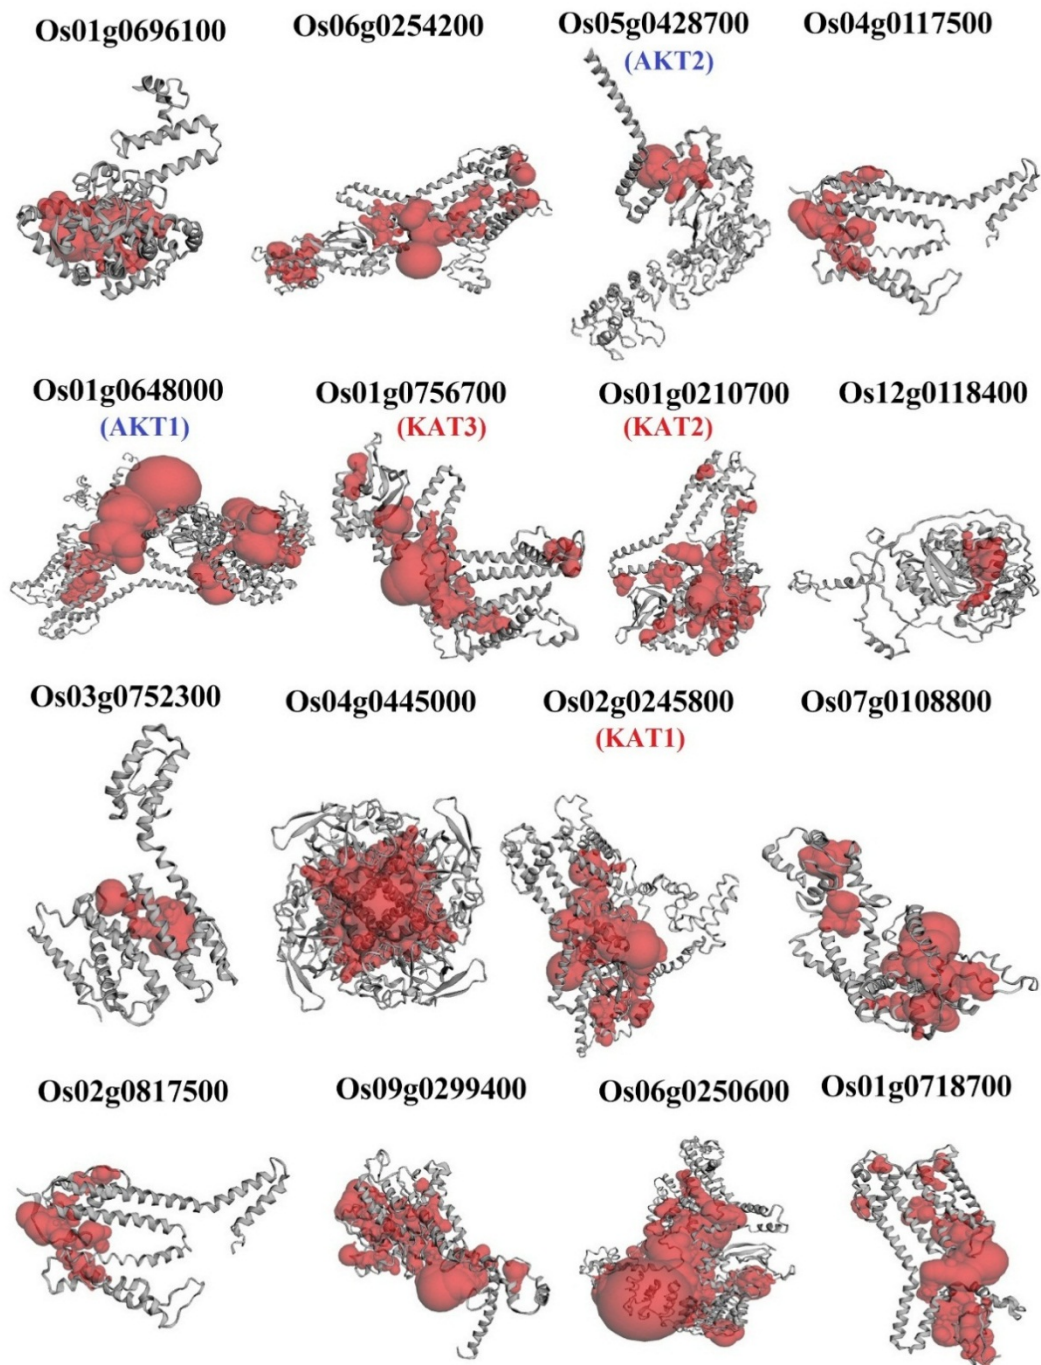

**Figure S2.** The protein channel regions predicted in  $K^+$  channel proteins in rice
